# Supplementary material for: Catalytic asymmetric heterogeneous aziridination of styrene derivatives using bis(oxazoline)-modified Cu2+-exchanged zeolite Y
Source: Royal Society of Chemistry journal article supplement (doi:10.1039/b411040b), 2004-01-01
Supplement: b411040b.pdf [file b411040b.pdf]

***N*-(*p*-nosylsufonyl)-2-(*p*-chlorophenyl)aziridine**

The general procedure was followed using CuHY (0.3 g)/Cu(OTf)<sub>2</sub> (0.015 g, 0.15 mmol) was added to the chiral bis(oxazoline) (0.039 g, 0.07 mmol) in dry acetonitrile (2.5 cm<sup>3</sup>) at 25°C and stirred for 15 minutes to preform the catalyst prior to the addition of the Cl styrene and nitrene donor. Cl styrene (0.135 g, 1.0 mmol) and the PhI=NNs nitrene donor (0.5881 g, 1.0 mmol), were then added and the mixture stirred. Reaction time: 12 h at room temperature. Flash column chromatography (1.5 x 20 cm silica, 10:1.5 petroleum ether (40/60)-ethyl acetate) afforded 0.16 g (54%) of the aziridine as acrySTALLINE solid: mp 101-102 °C; δ<sub>H</sub> (400 MHz, CDCl<sub>3</sub>) 8.35 (d, 2H, *J* = 8.02 Hz, Ar-*H*), 8.15 (d, 2H, *J* = 8.04 Hz, Ar-*H*), 7.25 (d, 2H, *J* = 8.2 Hz, Ar-*H*), 7.15 (d, 2H, *J* = 8.2 Hz, Ar-*H*), 3.82 (dd, 1H, *J*<sub>cis</sub> = 7.23 Hz, *J*<sub>trans</sub> = 4.5 Hz, CHPh-aziridine), 3.06 (d, 1H, *J* = 7.3 Hz), 2.41 (d, 1H, *J* = 4.5 Hz); Anal. calcd. for C<sub>14</sub>H<sub>11</sub>Cl(NO<sub>2</sub>)<sub>2</sub>S: C, 49.7; H, 3.3; N, 8.3; Cl, 10.4.

***N*-(*p*-nosylsufonyl)-2-(*p*-methylphenyl)aziridine**

The general procedure was followed using CuHY (0.3 g)/Cu(OTf)<sub>2</sub> (0.015 g, 0.15 mmol) was added to the chiral bis(oxazoline) (0.039 g, 0.07 mmol) in dry acetonitrile (2.5 cm<sup>3</sup>) at 25°C and stirred for 15 minutes to preform the catalyst prior to the addition of the CH<sub>3</sub> styrene and nitrene donor. CH<sub>3</sub> styrene (0.115 g, 1.0 mmol) and the PhI=NNs nitrene donor (0.5881 g, 1.0 mmol), were then added and the mixture stirred. Reaction time: 12 h at room temperature. Flash column chromatography (1.5 x 20 cm silica, 10:1.5 petroleum ether (40/60)-ethyl acetate) afforded 0.18 g (61%) of the aziridine as acrySTALLINE solid: mp 137-138 °C; δ<sub>H</sub> (400 MHz, CDCl<sub>3</sub>) 8.32 (d, 2H, *J* = 8.02 Hz, Ar-*H*), 8.10 (d, 2H, *J* = 8.01 Hz, Ar-*H*), 7.05 (s, 4H, Ar-*H*), 3.82 (dd, 1H, *J*<sub>cis</sub> = 7.2 Hz, *J*<sub>trans</sub> = 4.5 Hz, CHPh-aziridine), 3.05 (d, 1H, Ar-*H*, *J* = 7.2 Hz) 2.42 (s, 3H, Ar-CH<sub>3</sub>), 2.25 (s, 1H, *J* = 4.5 Hz); Anal. calcd. for C<sub>15</sub>H<sub>14</sub>(NO<sub>2</sub>)<sub>2</sub>S: C, 56.60; H, 4.40; N, 8.81.

***N*-(*p*-nosylsufonyl)-2-(*p*-fluorophenyl)aziridine**

The general procedure was followed using CuHY (0.3 g)/Cu(OTf)<sub>2</sub> (0.015 g, 0.15 mmol) was added to the chiral bis(oxazoline) (0.039 g, 0.07 mmol) in dry acetonitrile (2.5 cm<sup>3</sup>) at 25°C and stirred for 15 minutes to preform the catalyst prior to the addition of the CH<sub>3</sub> styrene and nitrene donor. F styrene (0.119 g, 1.0 mmol) and the PhI=NNs nitrene donor (0.5881 g, 1.0 mmol), were then added and the mixture stirred. Reaction time: 12 h at room temperature. Flash column chromatography (1.5 x 20 cm silica, 10:1.5 petroleum ether (40/60)-ethyl acetate) afforded 0.19 g (64%) of the aziridine as acrySTALLINE solid: mp 141-142 °C; δ<sub>H</sub> (400 MHz, CDCl<sub>3</sub>) 8.35 (d, 2H, *J* = 8.0 Hz, Ar-*H*), 8.15 (d, 2H, *J* = 6.91 Hz, Ar-*H*), 7.21 (d, 2H, *J* = 7.9 Hz, Ar-*H*), 7.05 (d, 2H, *J* = 7.9 Hz, Ar-*H*), 3.82 (dd, 1H, *J*<sub>cis</sub> = 7.21 Hz, *J*<sub>trans</sub> = 4.6 Hz, CHPh-aziridine), 3.05 (d, 1H, *J* = 7.6 Hz), 2.43 (d, 1H, *J* = 4.6 Hz); Anal. calcd. for C<sub>14</sub>H<sub>11</sub>F(NO<sub>2</sub>)<sub>2</sub>S: C, 52.17; H, 3.42; N, 8.70.

***N*-(*p*-nosylsufonyl)-2-(*p*-bromophenyl)aziridine**

The general procedure was followed using CuHY (0.3 g)/Cu(OTf)<sub>2</sub> (0.015 g, 0.15 mmol) was added to the chiral bis(oxazoline) (0.039 g, 0.07 mmol) in dry acetonitrile (2.5 cm<sup>3</sup>) at 25°C and stirred for 15 minutes to preform the catalyst prior to the addition of the Br styrene and nitrene donor. Br styrene (0.119 g, 1.0 mmol) and the PhI=NNs nitrene donor (0.5881 g, 1.0 mmol), were then added and the mixture stirred. Reaction time: 12 h at room temperature.

Flash column chromatography (1.5 x 20 cm silica, 10:1.5 petroleum ether (40/60)-ethyl acetate) afforded 0.19 g (64%) of the aziridine as acrySTALLINE solid: mp 144-145 °C; δ<sub>H</sub> (400 MHz, CDCl<sub>3</sub>) 8.32 (d, 2H, *J* = 8.32 Hz, Ar-*H*), 8.12 (d, 2H, *J* = 8.07 Hz), 7.35 (d, 2H, *J* = 8.8 Hz, Ar-*H*), 7.05 (d, 2H, *J* = 8.6 Hz, Ar-*H*), 3.76 (dd, 1H, *J*<sub>cis</sub> = 7.2 Hz, *J*<sub>trans</sub> = 4.2 Hz, CHPh-aziridine), 3.05 (d, 1H, *J* = 7.3 Hz), 2.41 (d, 1H, *J* = 4.5 Hz) Anal. calcd. for C<sub>14</sub>H<sub>11</sub>Br(NO<sub>2</sub>)<sub>2</sub>S: C, 43.86; H, 2.87; N, 7.31.

***N*-(*p*-nosylsufonyl)-2-(*p*-*α*-methylphenyl)aziridine**

The general procedure was followed using CuHY (0.3 g)/Cu(OTf)<sub>2</sub> (0.015 g, 0.15 mmol) was added to the chiral bis(oxazoline) (0.039 g, 0.07 mmol) in dry acetonitrile (2.5 cm<sup>3</sup>) at 25°C and stirred for 15 minutes to preform the catalyst prior to the addition of the CH<sub>3</sub> styrene and nitrene donor. CH<sub>3</sub> styrene (0.115 g, 1.0 mmol) and the PhI=NNs nitrene donor (0.5881 g, 1.0 mmol), were then added and the mixture stirred. Reaction time: 12 h at room temperature. Flash column chromatography (1.5 x 20 cm silica, 10:1.5 petroleum ether (40/60)-ethyl acetate) afforded 0.18 g (61%) of the aziridine as acrySTALLINE solid: mp 81-83 °C; δ<sub>H</sub> (400 MHz, CDCl<sub>3</sub>) 8.25 (d, 2H, *J* = 8.3 Hz, Ar-*H*), 8.05 (d, 2H, *J* = 8.07 Hz, Ar-*H*), 7.21 (s, 4H, Ar-*H*), 3.81 (dd, 1H, *J*<sub>cis</sub> = 7.2 Hz, *J*<sub>trans</sub> = 4.4 Hz, CHPh-aziridine), 3.0 (d, 1H, Ar-*H*, *J* = 7.1 Hz) 2.40 (s, 3H, Ar-CH<sub>3</sub>), 2.0 (s, 1H, *J* = 4.4 Hz); Anal. calcd. for C<sub>15</sub>H<sub>14</sub>(NO<sub>2</sub>)<sub>2</sub>S: C, 56.60; H, 4.40; N, 8.81.
